# Supplementary material for: Clinical Workflow of Cone Beam Computer Tomography-Based Daily Online Adaptive Radiotherapy with Offline Magnetic Resonance Guidance: The Modular Adaptive Radiotherapy System (MARS)
Source: MDPI journal article supplement (doi:10.3390/cancers16061210), 2024-03-19
Supplement: s1 [file s1]

### Supplementary Data:

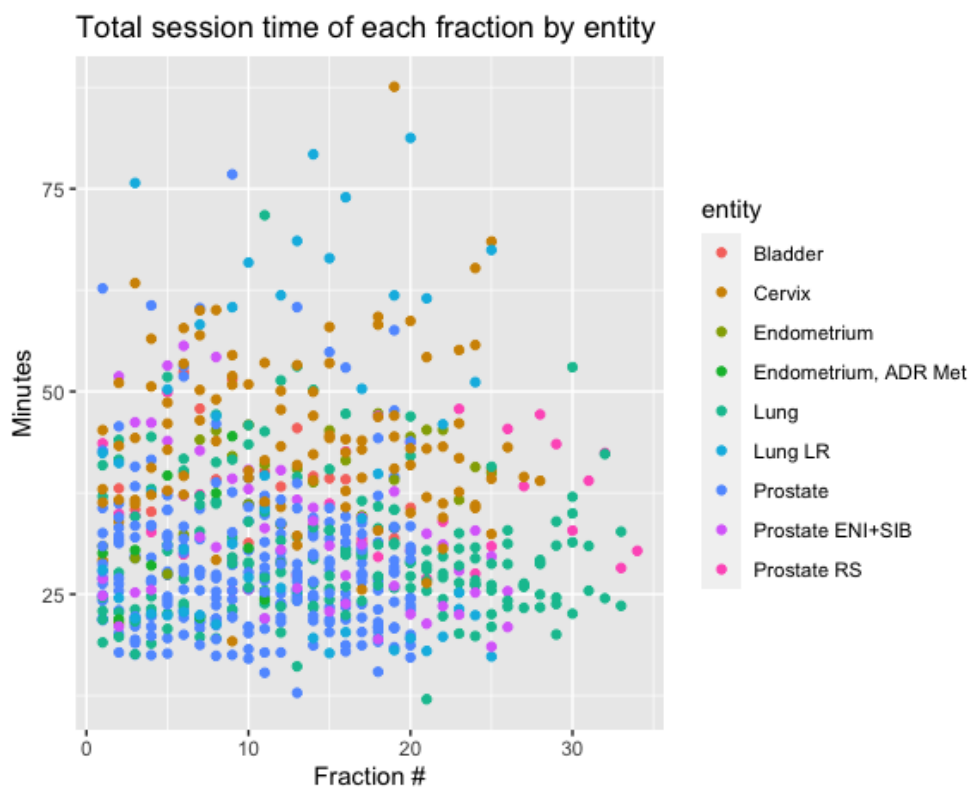

**Figure S1.** Total session time of Ethos oART adaptive sessions (n = 720). Entities refer to the different treatment concepts listed in Table 2. Abbreviations: ADR Met: adrenal gland metastasis, ENI + SIB: elective nodal irradiation + simultaneous integrated boost, LR: local recurrence, RS: rectal surgery

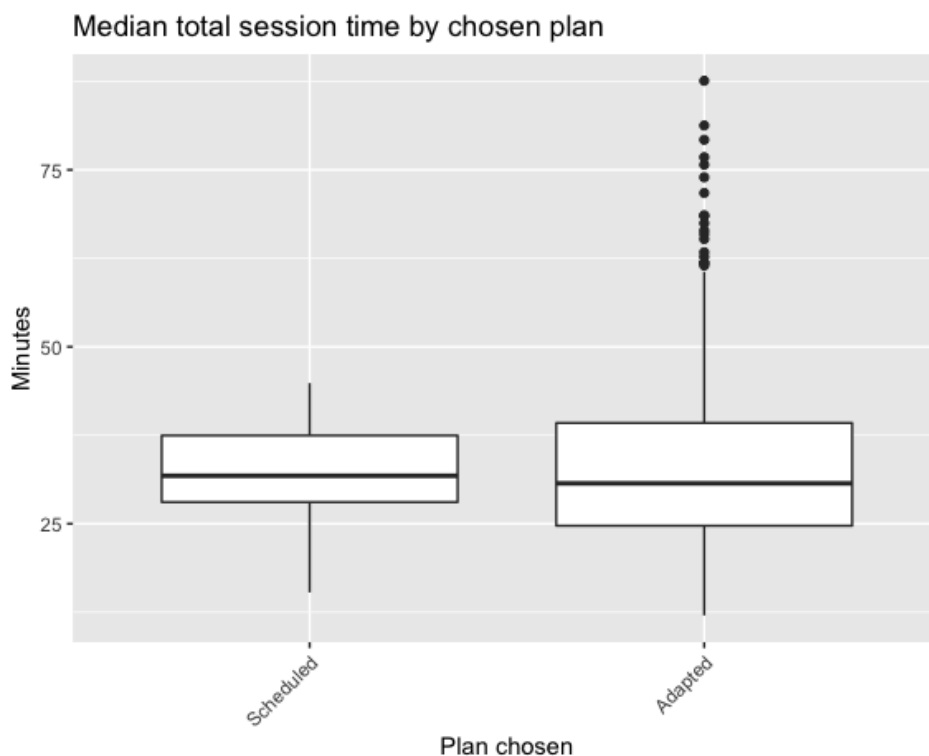

**Figure S2.** Median total session time by chosen plan. Numbers of fractions were scheduled (n = 17) and adapted (n = 720). Outliers >120 minutes (n = 1) are not shown but were included in the analysis.
